# Supplementary material for: Forecasting the Cumulative COVID-19 Cases in Indonesia Using Flower Pollination Algorithm
Source: MDPI journal article supplement (doi:10.3390/computation10120214), 2022-12-07
Supplement: s1 [file s1]

**Supplementary Table S1.** The experiment results of validation process using 72 hyperparameters combinations for RNN.

| No | Number of Timestep | Number of Dimension | Learning rates | Dropout | Number of Layer | RMSE     |
|----|--------------------|---------------------|----------------|---------|-----------------|----------|
| 1  | 5                  | 10                  | 0.001          | 20%     | 1               | 6455.79  |
| 2  | 5                  | 10                  | 0.001          | 20%     | 2               | 15102.78 |
| 3  | 5                  | 10                  | 0.001          | 50%     | 1               | 20037.31 |
| 4  | 5                  | 10                  | 0.001          | 50%     | 2               | 46488.23 |
| 5  | 5                  | 10                  | 0.001          | -       | 1               | 615.21   |
| 6  | 5                  | 10                  | 0.001          | -       | 2               | 2267.49  |
| 7  | 5                  | 10                  | 0.01           | 20%     | 1               | 3132.61  |
| 8  | 5                  | 10                  | 0.01           | 20%     | 2               | 10747.03 |
| 9  | 5                  | 10                  | 0.01           | 50%     | 1               | 13736.34 |
| 10 | 5                  | 10                  | 0.01           | 50%     | 2               | 40397.44 |
| 11 | 5                  | 10                  | 0.01           | -       | 1               | 942.93   |
| 12 | 5                  | 10                  | 0.01           | -       | 2               | 54945.72 |
| 13 | 5                  | 30                  | 0.001          | 20%     | 1               | 8149.38  |
| 14 | 5                  | 30                  | 0.001          | 20%     | 2               | 11932.18 |
| 15 | 5                  | 30                  | 0.001          | 50%     | 1               | 11399.94 |
| 16 | 5                  | 30                  | 0.001          | 50%     | 2               | 29420.98 |
| 17 | 5                  | 30                  | 0.001          | -       | 1               | 2520.51  |
| 18 | 5                  | 30                  | 0.001          | -       | 2               | 932.39   |
| 19 | 5                  | 30                  | 0.01           | 20%     | 1               | 54952.61 |
| 20 | 5                  | 30                  | 0.01           | 20%     | 2               | 11608.38 |
| 21 | 5                  | 30                  | 0.01           | 50%     | 1               | 16836.73 |
| 22 | 5                  | 30                  | 0.01           | 50%     | 2               | 28160.45 |
| 23 | 5                  | 30                  | 0.01           | -       | 1               | 54997.90 |
| 24 | 5                  | 30                  | 0.01           | -       | 2               | 2680.59  |
| 25 | 5                  | 50                  | 0.001          | 20%     | 1               | 1516.92  |
| 26 | 5                  | 50                  | 0.001          | 20%     | 2               | 13763.08 |
| 27 | 5                  | 50                  | 0.001          | 50%     | 1               | 9819.33  |
| 28 | 5                  | 50                  | 0.001          | 50%     | 2               | 29329.76 |
| 29 | 5                  | 50                  | 0.001          | -       | 1               | 704.66   |
| 30 | 5                  | 50                  | 0.001          | -       | 2               | 2601.87  |
| 31 | 5                  | 50                  | 0.01           | 20%     | 1               | 824.07   |
| 32 | 5                  | 50                  | 0.01           | 20%     | 2               | 11125.27 |
| 33 | 5                  | 50                  | 0.01           | 50%     | 1               | 11438.29 |
| 34 | 5                  | 50                  | 0.01           | 50%     | 2               | 27020.55 |
| 35 | 5                  | 50                  | 0.01           | -       | 1               | 54975.26 |
| 36 | 5                  | 50                  | 0.01           | -       | 2               | 3097.37  |
| 37 | 7                  | 10                  | 0.001          | 20%     | 1               | 55481.10 |
| 38 | 7                  | 10                  | 0.001          | 20%     | 2               | 16909.37 |
| 39 | 7                  | 10                  | 0.001          | 50%     | 1               | 20101.65 |
| 40 | 7                  | 10                  | 0.001          | 50%     | 2               | 40856.31 |
| 41 | 7                  | 10                  | 0.001          | -       | 1               | 962.31   |
| 42 | 7                  | 10                  | 0.001          | -       | 2               | 55515.60 |
| 43 | 7                  | 10                  | 0.01           | 20%     | 1               | 55481.10 |
| 44 | 7                  | 10                  | 0.01           | 20%     | 2               | 19731.17 |
| 45 | 7                  | 10                  | 0.01           | 50%     | 1               | 17230.95 |

|           |          |           |             |          |          |               |
|-----------|----------|-----------|-------------|----------|----------|---------------|
| 46        | 7        | 10        | 0.01        | 50%      | 2        | 33340.80      |
| <b>47</b> | <b>7</b> | <b>10</b> | <b>0.01</b> | <b>-</b> | <b>1</b> | <b>502.95</b> |
| 48        | 7        | 10        | 0.01        | -        | 2        | 55481.10      |
| 49        | 7        | 30        | 0.001       | 20%      | 1        | 55481.10      |
| 50        | 7        | 30        | 0.001       | 20%      | 2        | 16668.74      |
| 51        | 7        | 30        | 0.001       | 50%      | 1        | 14801.79      |
| 52        | 7        | 30        | 0.001       | 50%      | 1        | 34808.41      |
| 53        | 7        | 30        | 0.001       | -        | 2        | 1470.13       |
| 54        | 7        | 30        | 0.001       | -        | 1        | 2539.19       |
| 55        | 7        | 30        | 0.01        | 20%      | 2        | 7298.23       |
| 56        | 7        | 30        | 0.01        | 20%      | 1        | 14575.78      |
| 57        | 7        | 30        | 0.01        | 50%      | 2        | 7880.00       |
| 58        | 7        | 30        | 0.01        | 50%      | 1        | 26408.44      |
| 59        | 7        | 30        | 0.01        | -        | 2        | 951.74        |
| 60        | 7        | 30        | 0.01        | -        | 1        | 1360.84       |
| 61        | 7        | 50        | 0.001       | 20%      | 2        | 5607.82       |
| 62        | 7        | 50        | 0.001       | 20%      | 1        | 11161.42      |
| 63        | 7        | 50        | 0.001       | 50%      | 2        | 17197.63      |
| 64        | 7        | 50        | 0.001       | 50%      | 1        | 31307.02      |
| 65        | 7        | 50        | 0.001       | -        | 2        | 511.15        |
| 66        | 7        | 50        | 0.001       | -        | 1        | 2624.28       |
| 67        | 7        | 50        | 0.01        | 20%      | 2        | 1790.67       |
| 68        | 7        | 50        | 0.01        | 20%      | 1        | 14076.66      |
| 69        | 7        | 50        | 0.01        | 50%      | 2        | 12236.72      |
| 70        | 7        | 50        | 0.01        | 50%      | 1        | 37269.20      |
| 71        | 7        | 50        | 0.01        | -        | 2        | 580.73        |
| 72        | 7        | 50        | 0.01        | -        | 1        | 31047.93      |

**Supplementary Table S2.** The experiment results of validation process using 24 hyperparameters combinations for FPA.

| No.      | Number of Timestep | Population size | Switch Probability | RMSE          |
|----------|--------------------|-----------------|--------------------|---------------|
| 1        | 5                  | 50              | 0.3                | 875.89        |
| 2        | 5                  | 50              | 0.5                | 576.43        |
| 3        | 5                  | 50              | 0.8                | 427.68        |
| <b>4</b> | <b>5</b>           | <b>100</b>      | <b>0.3</b>         | <b>292.66</b> |
| 5        | 5                  | 100             | 0.5                | 508.58        |
| 6        | 5                  | 100             | 0.8                | 299.18        |
| 7        | 5                  | 150             | 0.3                | 440.74        |
| 8        | 5                  | 150             | 0.5                | 297.94        |
| 9        | 5                  | 150             | 0.8                | 307.43        |
| 10       | 5                  | 200             | 0.3                | 837.58        |
| 11       | 5                  | 200             | 0.5                | 358.35        |
| 12       | 5                  | 200             | 0.8                | 381.15        |
| 13       | 7                  | 50              | 0.3                | 1291.64       |
| 14       | 7                  | 50              | 0.5                | 336.70        |
| 15       | 7                  | 50              | 0.8                | 337.89        |
| 16       | 7                  | 100             | 0.3                | 343.20        |
| 17       | 7                  | 100             | 0.5                | 367.40        |
| 18       | 7                  | 100             | 0.8                | 322.39        |
| 19       | 7                  | 150             | 0.3                | 523.00        |
| 20       | 7                  | 150             | 0.5                | 331.45        |
| 21       | 7                  | 150             | 0.8                | 319.14        |
| 22       | 7                  | 200             | 0.3                | 471.08        |
| 23       | 7                  | 200             | 0.5                | 319.15        |
| 24       | 7                  | 200             | 0.8                | 345.33        |
